# Supplementary material for: The effect of olive leaf extract on cardiovascular health markers: a randomized placebo-controlled clinical trial
Source: PubMed Central journal article supplement (PMC8137474; doi:10.1007/s00394-020-02397-9), 2020-10-09
Supplement: 394_2020_2397_MOESM1_ESM.pdf [file 394_2020_2397_MOESM1_ESM.pdf]

**THE EFFECT OF OLIVE LEAF EXTRACT ON CARDIOVASCULAR HEALTH  
MARKERS: A RANDOMIZED PLACEBO-CONTROLLED CLINICAL TRIAL**

**European Journal of Nutrition**

Yala Stevens<sup>1,2</sup>, Bjorn Winkens<sup>3</sup>, Daisy Jonkers<sup>1</sup>, Adrian Masclee<sup>1</sup>

<sup>1</sup> Department of Internal Medicine, Division of Gastroenterology-Hepatology, School of Nutrition and Translational Research in Metabolism (NUTRIM), Maastricht University, Maastricht, The Netherlands

<sup>2</sup> BioActor BV, Maastricht, The Netherlands

<sup>3</sup> Department of Methodology and Statistics, Care and Public Health Research Institute (CAPHRI), Maastricht University, Maastricht, the Netherlands.

**Corresponding author**

Yala Stevens

E-mail: [yala.stevens@maastrichtuniversity.nl](mailto:yala.stevens@maastrichtuniversity.nl)

## SUPPLEMENTAL TABLES

**Supplemental Table 1.** Liver function parameters at baseline and after 8 weeks of supplementation

|                       | Placebo    |            | OLE        |            | <i>Uncorrected</i><br><i>P</i> value |
|-----------------------|------------|------------|------------|------------|--------------------------------------|
|                       | Baseline   | 8 weeks    | Baseline   | 8 weeks    |                                      |
| ALP (U/l)             | 72.9 ± 3.0 | 72.5 ± 3.3 | 77.0 ± 2.9 | 78.1 ± 3.2 | 0.425                                |
| GGT (U/l)             | 32.6 ± 3.8 | 32.0 ± 3.8 | 25.1 ± 3.7 | 25.1 ± 3.8 | 0.792                                |
| AST (U/l)             | 23.8 ± 1.1 | 22.4 ± 1.4 | 23.7 ± 1.1 | 23.7 ± 1.4 | 0.320                                |
| ALT (U/l)             | 27.3 ± 2.1 | 26.7 ± 2.9 | 27.1 ± 2.1 | 29.3 ± 2.9 | 0.246                                |
| Bilirubin<br>(μmol/l) | 10.3 ± 1.0 | 11.6 ± 1.1 | 9.0 ± 1.0  | 9.6 ± 1.1  | 0.600                                |

All values are presented as mean ± SEM. Differences between the placebo and OLE after 8 weeks of supplementation were compared with an unstructured linear mixed model with correction for baseline values. ALP, alkaline phosphatase; GGT, gamma-glutamyl transferase; AST, aspartate aminotransferase; ALT, alanine aminotransferase.

**Supplemental Table 2.** GSRS sub scores, stool frequency and stool consistency at baseline, after 4 weeks and after 8 weeks of supplementation

|                         | Placebo   |           |           | OLE       |           |           | <i>Uncorrected</i>    | <i>Uncorrected</i>    |
|-------------------------|-----------|-----------|-----------|-----------|-----------|-----------|-----------------------|-----------------------|
|                         | Baseline  | 4 weeks   | 8 weeks   | Baseline  | 4 weeks   | 8 weeks   | <i>P</i> <sub>1</sub> | <i>P</i> <sub>2</sub> |
| Abdominal pain          | 1.4 ± 0.1 | 1.4 ± 0.1 | 1.4 ± 0.1 | 1.5 ± 0.1 | 1.4 ± 0.1 | 1.5 ± 0.1 | 0.941                 | 0.768                 |
| Reflux                  | 1.3 ± 0.1 | 1.2 ± 0.1 | 1.2 ± 0.1 | 1.3 ± 0.1 | 1.3 ± 0.1 | 1.4 ± 0.1 | 0.750                 | 0.215                 |
| Diarrhea                | 1.4 ± 0.1 | 1.7 ± 0.1 | 1.5 ± 0.1 | 1.4 ± 0.1 | 1.6 ± 0.1 | 1.7 ± 0.1 | 0.589                 | 0.379                 |
| Indigestion             | 1.9 ± 0.1 | 1.6 ± 0.1 | 1.7 ± 0.1 | 1.9 ± 0.1 | 1.8 ± 0.1 | 1.9 ± 0.1 | 0.137                 | 0.202                 |
| Constipation            | 1.5 ± 0.1 | 1.5 ± 0.1 | 1.6 ± 0.1 | 1.4 ± 0.1 | 1.4 ± 0.1 | 1.5 ± 0.1 | 0.798                 | 0.652                 |
| Stool frequency         | 1.6 ± 0.2 | 1.7 ± 0.1 | 1.7 ± 0.1 | 1.5 ± 0.2 | 1.4 ± 0.1 | 1.3 ± 0.1 | 0.195                 | 0.160                 |
| Stool type <sup>a</sup> | 3.7 ± 0.2 | 3.8 ± 0.2 | 3.8 ± 0.2 | 3.5 ± 0.2 | 3.7 ± 0.2 | 3.6 ± 0.2 | 0.557                 | 0.879                 |

All values are presented as mean ± SEM. Differences between the placebo and OLE were compared with an unstructured linear mixed model with correction for baseline values. *P*<sub>1</sub> and *P*<sub>2</sub> represent the *P* values for the difference in estimated means after 4 and 8 weeks of intervention, respectively, between placebo and OLE, corrected for baseline differences. GSRS, gastrointestinal symptom rating scale. <sup>a</sup> Values represent average self-reported scores over a period of 1 week.

## SUPPLEMENTAL FIGURES

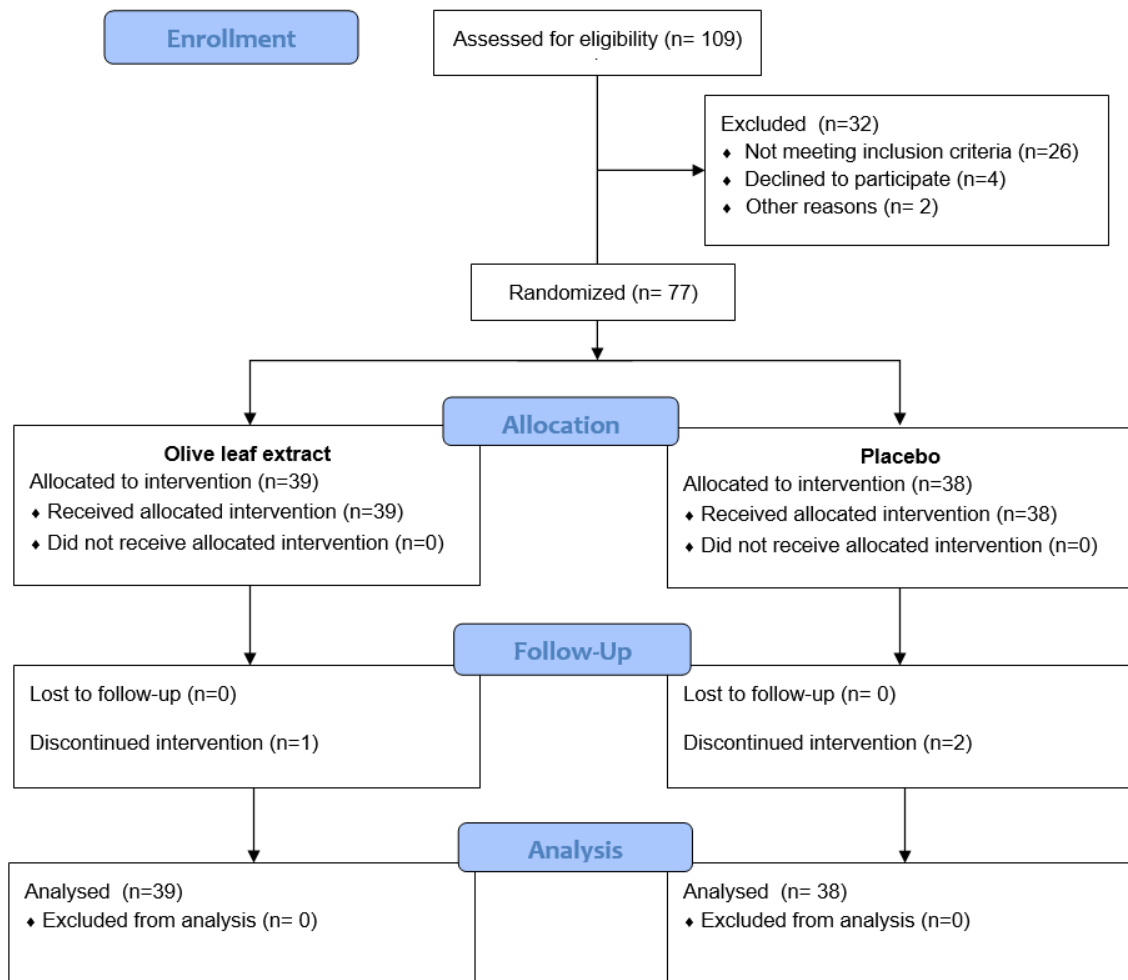

**Supplemental Figure 1.** CONSORT flow diagram
